# Supplementary material for: Enhancing the reactivity of 1,2-diphospholes in cycloaddition reactions
Source: publisher site journal article supplement (doi:10.3762/bjoc.11.17), 2015-01-27
Supplement: Additional file 1 [file 1860-5397-11-17-S1.pdf]

# Supporting Information

for

## Enhancing the reactivity of 1,2-diphospholes in cycloaddition reactions

Almaz Zagidullin\*<sup>§</sup>, Vasili Miluykov, Elena Oshchepkova, Artem Tufatullin, Olga Kataeva and Oleg Sinyashin

Address: A. E. Arbuzov Institute of Organic and Physical Chemistry, Kazan Scientific Centre, Russian Academy of Sciences, Arbuzov Str. 8, 420088 Kazan, Russia

Email: Almaz Zagidullin - [zagidullin@iopc.ru](mailto:zagidullin@iopc.ru);

<sup>§</sup>Phone +7-843-273-93-44

\*Corresponding author

Experimental procedures and characterization data

# Experimental

## General

All reactions and manipulations were carried out under dry pure N<sub>2</sub> using standard Schlenk apparatus. All solvents were distilled from sodium/benzophenone and stored under nitrogen before use. The NMR spectra were recorded on a Bruker MSL-400 (<sup>1</sup>H 400 MHz, <sup>31</sup>P 161.7 MHz, <sup>13</sup>C 100.6 MHz). SiMe<sub>4</sub> was used as internal reference for <sup>1</sup>H and <sup>13</sup>C NMR chemical shifts, and 85% H<sub>3</sub>PO<sub>4</sub> as external reference for <sup>31</sup>P. Infrared (IR) spectra were recorded on a Bruker Vector-22 spectrometer. The elemental analyses were carried out at the microanalysis laboratory of the Arbuzov Institute of Organic and Physical Chemistry, Russian Academy of Sciences.

## X-ray Structure Determination

Data set for single crystal **2e** was collected on a Bruker AXS Smart APEX-II CCD diffractometer with graphite-monochromated Mo K $\alpha$  radiation ( $\lambda = 0.71073$  Å). Programs used: data collection APEX2 [1], data reduction SAINT [2], absorption correction SADABS version 2.10 [3], structure solution SHELXS97 [4], structure refinement by full-matrix least-squares against F<sup>2</sup> using SHELXL-97 [4]. Hydrogen atoms were placed into calculated positions and refined as riding atoms in unequivocal cases. The figures were generated using ORTEP-3 [5] and Mercury CSD 2.0 [6] programs. One should note that because of the poor quality of crystals (with the ratio of reflections greater than  $I > 2\sigma(I)$  only 25%) large value of R<sub>int</sub> is observed, however the structure of this compound was determined unambiguously. It was impossible to find a reasonable model for solvate diethyl ether, thus the 'Squeeze' option of "Platon" [7] was applied to obtain a solvent-free reflection file which was further used for the refinement. **Crystal data for 2e:** formula C<sub>46</sub>H<sub>34</sub>F<sub>6</sub>P<sub>4</sub>+C<sub>4</sub>H<sub>10</sub>O, crystal size 0.18 × 0.18 × 0.11 mm<sup>3</sup>,  $M = 898.73$ , monoclinic, space group C2/c,  $a = 22.97(1)$  Å,  $b = 10.083(5)$  Å,  $c = 37.12(5)$  Å,

$\beta = 101.98(1)^\circ$ ,  $V = 8412(8) \text{ \AA}^3$ ,  $Z = 8$ ,  $\rho_{\text{calcd.}} = 1.419 \text{ g cm}^{-3}$ ,  $\mu = 0.246 \text{ mm}^{-1}$ ,  $\theta_{\text{max}} = 28^\circ$ , reflections collected: 61021; independent: 10390 ( $R_{\text{int}} = 0.2418$ ) and 3841 observed reflections [ $I > 2\sigma(I)$ ], 507 refined parameters,  $R_1 = 0.0845$ ,  $wR_2 = 0.1734$  [ $I > 2\sigma(I)$ ]; max/min residual electron density: 0.39/- 0.45 e/ $\text{\AA}^3$ , GoF = 0.85.

CCDC 1029752 contain the supplementary crystallographic data for this paper. These data can be obtained free of charge via [www.ccdc.cam.ac.uk/conts/retrieving.html](http://www.ccdc.cam.ac.uk/conts/retrieving.html) (or from the Cambridge Crystallographic Data Centre, 12, Union Road, Cambridge CB2 1EZ, UK; fax: +44 1223 336033; or [deposit@ccdc.cam.ac.uk](mailto:deposit@ccdc.cam.ac.uk)).

## Materials

Sodium 3,4,5-triaryl-1,2-diphosphacyclopentadienides were obtained according to a literature procedure [8,9]. Chloroacetonitrile, ethyl-2-chloroacetate, chloro(methoxy)methane, 1-bromo-2-ethoxyethane, ethyl iodide were freshly distilled before their use. *N*-phenylmaleimide was purchased from Aldrich and used without additional purification.

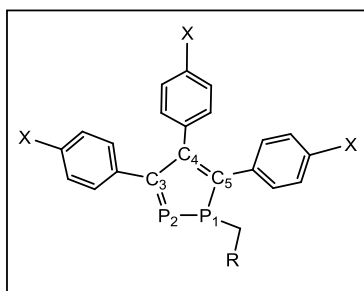

### 2-(3,4,5-Triphenyl-1,2-diphosphacyclopenta-2,4-dienyl)acetonitrile (**1a**).

Freshly distilled chloroacetonitrile  $\text{ClCH}_2\text{CN}$  (0.50 g, 6.55 mmol, 25% excess) was added to a solution of sodium (diglyme)<sub>2</sub> 3,4,5-triphenyl-1,2-diphosphacyclopentadienide (3.25 g, 5.24 mmol) in THF (30 mL) at  $-80^\circ\text{C}$  and then stirred for 2 h without cooling bath. Then the solvent was evaporated under reduced pressure and the residue was extracted with petroleum ether (2x40 mL). The petroleum ether extract was evaporated in vacuo to leave 1.06 g (55%) of 1-cyanomethylene-3,4,5-triphenyl-1,2-diphosphacyclopenta-2,4-diene (**1a**) as light-yellow oil.  $^1\text{H NMR}$  ( $5^\circ\text{C}$ ,  $\text{CDCl}_3$ ): 2.12-2.19 (m, 2H,  $\text{CH}_2$ ), 6.96 (t, 3H,  $^3J_{\text{HH}} = 6.4$ ), 6.93-7.00 (m, 3H), 7.03 (d, 2H,  $^3J_{\text{HH}} = 5.9$ ), 7.07 (d, 4H,  $^3J_{\text{HH}} = 7.3$ ), 7.23-7.29 (m, 2H), 7.31

(t, 1H,  $^3J_{\text{HH}} = 8.3$ ).  $^{31}\text{P}$  NMR (5°C,  $\text{CDCl}_3$ ): 30.8 (d,  $^1J_{\text{PP}} = 363.1$ ), 225.7 (d,  $^1J_{\text{PP}} = 363.1$ ).  $^{13}\text{C}$  NMR (5°C,  $\text{CDCl}_3$ ): 17.9 (dd,  $^1J_{\text{CP}} = 16.1$ ,  $^2J_{\text{CP}} = 5.8$ ,  $\text{CH}_2$ ), 115.4 (d,  $^2J_{\text{CP}} = 6.4$ , CN), 126.4 (s, *p*- $\text{C}_{\text{Ph}}$ ), 126.5 (s, *p*- $\text{C}_{\text{Ph}}$ ), 126.8 (s, *p*- $\text{C}_{\text{Ph}}$ ), 127.5 (s, *m*- $\text{C}_{\text{Ph}}$ ), 128.0 (s, *m*- $\text{C}_{\text{Ph}}$ ), 128.3 (s, *m*- $\text{C}_{\text{Ph}}$ ), 128.6 (dd,  $^3J_{\text{CP}} = 12.4$ ,  $^4J_{\text{CP}} = 1.5$ , *o*- $\text{C}_{\text{Ph}}$ ), 129.2 (d,  $^3J_{\text{CP}} = 9.3$ , *o*- $\text{C}_{\text{Ph}}$ ), 131.3 (t,  $^3J_{\text{CP}} = 9.1$ , *o*- $\text{C}_{\text{Ph}}$ ), 137.3 (d,  $^4J_{\text{CP}} = 5.3$ , *ipso*- $\text{C}_{\text{Ph}}$ ), 138.3 (dd,  $^2J_{\text{CP}} = 10.3$ ,  $^3J_{\text{CP}} = 4.1$ , *ipso*- $\text{C}_{\text{Ph}}$ ), 142.9 (d,  $^2J_{\text{CP}} = 19.0$ , *ipso*- $\text{C}_{\text{Ph}}$ ), 150.3 (pseudo t,  $^2J_{\text{CP}} = 15.1$ , C4), 164.1 (dd,  $^1J_{\text{CP}} = 10.7$ ,  $^2J_{\text{CP}} = 4.6$ , C5), 191.9 (dd,  $^1J_{\text{CP}} = 56.9$ ,  $^2J_{\text{CP}} = 14.3$ , C3).

**Ethyl 2-(3,4,5-triphenyl-1,2-diphosphacyclopenta-2,4-dienyl)acetate (1b).** In a similar manner **1b** was obtained from sodium (diglyme)<sub>2</sub> 3,4,5-triphenyl-1,2-diphosphacyclopentadienide (2.62 g, 4.22 mmol) and ethyl-2-chloroacetate  $\text{ClCH}_2\text{COOEt}$  (0.65 g, 5.28 mmol, 25% excess) as a light-yellow oil; yield 1.05 g (60%).  $^1\text{H}$  NMR (5°C,  $\text{CDCl}_3$ ): 0.62 (t, 3H,  $^3J_{\text{HH}} = 7.2$ ,  $\text{CH}_3$ ), 1.33-1.39 (m, 2H,  $\text{CH}_2$ ), 2.04-2.10 (m, 2H,  $\text{PCH}_2$ ), 6.83 (t, 4H,  $^3J_{\text{HH}} = 6.4$ ), 6.96 (d, 4H,  $^3J_{\text{HH}} = 4.8$ ), 7.03 (d, 2H,  $^3J_{\text{HH}} = 5.8$ ), 7.16 (d, 2H,  $^3J_{\text{HH}} = 7.4$ ), 7.23 (d, 2H,  $^3J_{\text{HH}} = 5.4$ ), 7.31 (t, 1H,  $^3J_{\text{HH}} = 8.3$ ).  $^{31}\text{P}$  NMR (5°C,  $\text{CDCl}_3$ ): 40.5 (d,  $^1J_{\text{PP}} = 389.0$ ), 223.3 (d,  $^1J_{\text{PP}} = 389.0$ ).  $^{13}\text{C}$  NMR (5°C,  $\text{CDCl}_3$ ): 15.1 (s,  $\text{CH}_3$ ), 31.0 (s,  $\text{OCH}_2$ ), 35.1 (dd,  $^1J_{\text{CP}} = 16.7$ ,  $^2J_{\text{CP}} = 5.8$ ,  $\text{PCH}_2$ ), 126.4 (s, *p*-Ph), 126.5 (s, *p*-Ph), 126.8 (s, *p*-Ph), 127.5 (s, *m*-Ph), 128.0 (s, *m*-Ph), 128.2 (s, *m*-Ph), 128.6 (dd,  $^2J_{\text{CP}} = 11.2$ ,  $^3J_{\text{CP}} = 2.5$ , *o*-Ph), 129.2 (d,  $^3J_{\text{CP}} = 9.3$ , *o*-Ph), 131.4 (tr,  $^2J_{\text{CP}} = 9.1$ , *o*-Ph), 132.1 (s, *o*-Ph), 133.8 (s,  $^2J_{\text{CP}} = 9.4$ , *o*-Ph), 137.3 (d,  $^2J_{\text{CP}} = 5.4$ , *ipso*-Ph), 138.3 (dd,  $^2J_{\text{CP}} = 10.4$ ,  $^2J_{\text{CP}} = 4.1$ , *ipso*-Ph), 142.9 (d,  $^2J_{\text{CP}} = 19.0$ , *ipso*-Ph), 150.3 (ps.tr.,  $^2J_{\text{CP}} = 15.1$ , C4), 164.1 (dd,  $^1J_{\text{CP}} = 10.8$ ,  $^2J_{\text{CP}} = 4.5$ , C5), 170.4 (dd,  $^2J_{\text{CP}} = 6.8$ ,  $^3J_{\text{CP}} = 3.5$ , C=O), 191.90 (dd,  $^1J_{\text{CP}} = 56.8$ ,  $^2J_{\text{CP}} = 14.3$ , C3).

**1-Methoxymethyl-3,4,5-triphenyl-1,2-diphosphacyclopenta-2,4-diene (1c).** In a similar manner **1c** was obtained from sodium (diglyme)<sub>2</sub> 3,4,5-triphenyl-1,2-

diphosphacyclopentadienide (2.02 g, 3.26 mmol) and chloro(methoxy)methane ClCH<sub>2</sub>OMe (0.33 g, 4.08 mmol, 25% excess) as a light-yellow powder; yield 0.69 g (57%); m.p. 59°C. <sup>1</sup>H NMR (5°C, CDCl<sub>3</sub>): 0.89 (s, 3H, CH<sub>3</sub>), 1.96-2.01 (m, 2H, CH<sub>2</sub>), 6.85 (d, 4H, <sup>3</sup>J<sub>HH</sub> = 3.42), 6.90 (d, 2H, <sup>3</sup>J<sub>HH</sub> = 7.34), 6.96 (d, 4H, <sup>3</sup>J<sub>HH</sub> = 6.85), 6.99-7.03 (m, 1H, <sup>3</sup>J<sub>HH</sub> = 5.38), 7.20 (d, 2H, <sup>3</sup>J<sub>HH</sub> = 7.34), 7.29 (d, 2H, <sup>3</sup>J<sub>HH</sub> = 5.87). <sup>31</sup>P NMR (5°C, CDCl<sub>3</sub>): 61.2 (d, <sup>1</sup>J<sub>PP</sub> = 404.0), 209.3 (d, <sup>1</sup>J<sub>PP</sub> = 404.0). <sup>13</sup>C NMR (5°C, CDCl<sub>3</sub>): 23.4 (d, <sup>3</sup>J<sub>CP</sub> = 7.8, CH<sub>3</sub>), 31.5 (dd, <sup>1</sup>J<sub>CP</sub> = 26.3, <sup>2</sup>J<sub>CP</sub> = 15.8, CH<sub>2</sub>), 126.4 (s, *p*-Ph), 126.5 (s, *p*-Ph), 126.8 (s, *p*-Ph), 127.5 (s, *m*-Ph), 128.1 (s, *m*-Ph), 128.2 (s, *m*-Ph), 128.6 (s, *o*-Ph), 129.2 (s, *o*-Ph), 130.4 (d, <sup>3</sup>J<sub>CP</sub> = 3.2, *o*-Ph), 137.5 (d, <sup>3</sup>J<sub>CP</sub> = 6.2, *ipso*-Ph), 138.2 (dd, <sup>3</sup>J<sub>CP</sub> = 10.3, <sup>3</sup>J<sub>CP</sub> = 3.7, *ipso*-Ph), 142.8 (d, <sup>3</sup>J<sub>CP</sub> = 19.4, *ipso*-Ph), 149.2 (ps.tr., <sup>3</sup>J<sub>CP</sub> = 14.5, C4), 164.6 (dd, <sup>1</sup>J<sub>CP</sub> = 14.3, <sup>2</sup>J<sub>CP</sub> = 3.1, C5), 187.8 (dd, <sup>1</sup>J<sub>CP</sub> = 57.1, <sup>2</sup>J<sub>CP</sub> = 14.8, C3).

**1-(2-Ethoxyethyl)-3,4,5-triphenyl-1,2-diphosphacyclopenta-2,4-diene (1d).** In a similar manner **1d** was obtained from sodium (diglyme)<sub>2</sub> 3,4,5-triphenyl-1,2-diphosphacyclopentadienide (0.94 g, 1.52 mmol) and 1-bromo-2-ethoxyethane BrCH<sub>2</sub>CH<sub>2</sub>OEt (0.26 g, 1.90 mmol, 25% excess) as a light-yellow oil; yield 0.36 g (59%). <sup>1</sup>H NMR (CDCl<sub>3</sub>): 0.59 (t, 3H, <sup>3</sup>J<sub>HH</sub> = 6.9, CH<sub>3</sub>), 1.42-1.47 (m, 2H, OCH<sub>2</sub>), 1.51-1.57 (m, 2H, OCH<sub>2</sub>), 1.88-1.93 (m, 2H, PCH<sub>2</sub>), 6.85 (d, 4H, <sup>3</sup>J<sub>HH</sub> = 3.42), 6.90 (d, 2H, <sup>3</sup>J<sub>HH</sub> = 7.34), 6.96 (d, 4H, <sup>3</sup>J<sub>HH</sub> = 6.85), 6.99-7.07 (m, 1H, <sup>3</sup>J<sub>HH</sub> = 5.38), 7.20 (d, 2H, <sup>3</sup>J<sub>HH</sub> = 7.34), 7.29 (d, 2H, <sup>3</sup>J<sub>HH</sub> = 5.87). <sup>31</sup>P NMR (CDCl<sub>3</sub>): 51.9 (d, <sup>1</sup>J<sub>PP</sub> = 407.3), 214.1 (d, <sup>1</sup>J<sub>PP</sub> = 407.3). <sup>13</sup>C NMR (CDCl<sub>3</sub>): 16.7 (s, CH<sub>3</sub>), 25.6 (s, CH<sub>2</sub>), 27.3 (d, <sup>2</sup>J<sub>CP</sub> = 9.7, CH<sub>2</sub>), 37.8 (dd, <sup>1</sup>J<sub>CP</sub> = 16.3, <sup>2</sup>J<sub>CP</sub> = 5.8, CH<sub>2</sub>), 126.4 (s, *p*-Ph), 126.5 (s, *p*-Ph), 126.8 (s, *p*-Ph), 127.4 (s, *m*-Ph), 128.2 (s, *m*-Ph), 128.3 (s, *m*-Ph), 128.5 (s, *o*-Ph), 129.2 (s, *o*-Ph), 130.5 (d, <sup>3</sup>J<sub>CP</sub> = 1.4, *o*-Ph), 131.7 (s, *o*-Ph), 133.5 (s, *o*-Ph), 137.6 (d, <sup>3</sup>J<sub>CP</sub> = 6.2, *ipso*-Ph), 138.24 (dd, <sup>3</sup>J<sub>CP</sub> = 10.4, <sup>3</sup>J<sub>CP</sub> = 3.8, *ipso*-Ph), 142.8 (d, <sup>3</sup>J<sub>CP</sub> = 9.8, *ipso*-Ph), 149.7

(ps.tr,  $^3J_{CP} = 15.51$ , C4), 164.5 (dd,  $^1J_{CP} = 7.3$ ,  $^2J_{CP} = 3.1$ , C5), 185.8 (dd,  $^1J_{CP} = 47.1$ ,  $^2J_{CP} = 14.9$ , C3).

**1-Ethyl-3,4,5-tri(*p*-fluorophenyl)-1,2-diphosphacyclopenta-2,4-diene (1e).** In a similar manner **1e** was obtained from sodium (diglyme)<sub>2</sub> 3,4,5-tri(*para*-fluorophenyl)-1,2-diphosphacyclopentadienide (1.86 g, 2.76 mmol) and ethyl iodide Etl (0.54 g, 3.45 mmol, 25% excess) as a light-yellow powder; yield 0.68 g (60%); m.p. 63°C.  $^1\text{H}$  NMR (CDCl<sub>3</sub>): 1.14 (dd,  $^3J_{\text{HH}} = 10.3$ ,  $^3J_{\text{PH}} = 8.8$ , 3H, Me), 1.88-1.93 (m, 2H, CH<sub>2</sub>), 7.01 (t, 4H,  $^3J_{\text{HH}} = 6.36$ ), 7.13 (d, 4H,  $^3J_{\text{HH}} = 4.89$ ), 7.17 (d, 4H,  $^3J_{\text{HH}} = 7.34$ ).  $^{31}\text{P}$  NMR (CDCl<sub>3</sub>): 73.4 (d,  $^1J_{\text{PP}} = 407.8$ ), 218.5 (d,  $^1J_{\text{PP}} = 407.8$ ).  $^{13}\text{C}$  NMR (CDCl<sub>3</sub>): 12.01 (d,  $^2J_{\text{CP}} = 9.51$ , CH<sub>3</sub>), 17.87 (dd,  $^1J_{\text{CP}} = 16.13$ ,  $^2J_{\text{CP}} = 5.79$ , CH<sub>2</sub>), 127.4 (s, *p*-C<sub>Ph</sub>), 127.5 (s, *p*-C<sub>Ph</sub>), 127.7 (s, *p*-C<sub>Ph</sub>), 127.9 (s, *m*-C<sub>Ph</sub>), 128.1 (s, *m*-C<sub>Ph</sub>), 128.4 (s, *m*-C<sub>Ph</sub>), 128.7 (dd,  $^3J_{\text{CP}} = 13.4$ ,  $^4J_{\text{CP}} = 2.8$ , *o*-C<sub>Ph</sub>), 129.4 (d,  $^3J_{\text{CP}} = 9.3$ , *o*-C<sub>Ph</sub>), 130.5 (t,  $^3J_{\text{CP}} = 7.8$ , *o*-C<sub>Ph</sub>), 137.8 (d,  $^4J_{\text{CP}} = 5.3$ , *ipso*-C<sub>Ph</sub>), 139.6 (dd,  $^2J_{\text{CP}} = 11.4$ ,  $^3J_{\text{CP}} = 4.3$ , *ipso*-C<sub>Ph</sub>), 142.7 (d,  $^2J_{\text{CP}} = 17.2$ , *ipso*-C<sub>Ph</sub>), 153.2 (t,  $^2J_{\text{CP}} = 14.1$ , C4), 160.9 (dd,  $^1J_{\text{CP}} = 10.7$ ,  $^2J_{\text{CP}} = 4.8$ , C5), 161.1 (d,  $^1J_{\text{CF}} = 161.2$ , C-F), 161.4 (d,  $^1J_{\text{CF}} = 165.0$ , C-F), 161.4 (d,  $^1J_{\text{CF}} = 163.2$ , C-F), 176.9 (dd,  $^1J_{\text{CP}} = 24.4$ ,  $^2J_{\text{CP}} = 13.2$ , C3).

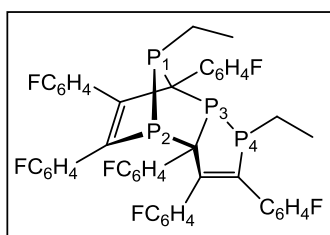

**2,3,4,4a,5,6-Hexa(*p*-fluorophenyl)-1-ethyl-1,7,7a-triphospha-4,7-(ethylphosphinidene)-indene (2e).** A solution of 0.4 g of 1-ethyl-3,4,5-tri(*para*-fluorophenyl)-1,2-diphosphacyclopenta-2,4-diene (**1e**) in toluene (10 mL) was

stirred for 4 h at 60 °C. After cooling to room temp, the solvent was evaporated and the residue was washed with n-hexane, dried in vacuo to leave 0.27 g (67%) to give *rac*-2,3,4,4a,5,6-hexa(*para*-fluorophenyl)-1-ethyl-1,7,7a-triphospha-4,7-(ethylphosphinidene)-indene (**2e**) as a white powder; m.p.130°C.  $^1\text{H}$  NMR (CDCl<sub>3</sub>): 0.58

(dt,  $^3J_{\text{HH}} = 7.8$ ,  $^3J_{\text{PH}} = 17.4$ , 3H, Me), 0.83-0.93 (m, 2H, CH<sub>2</sub>), 1.39 (dt,  $^3J_{\text{HH}} = 7.7$ ,  $^3J_{\text{PH}} = 15.9$ , 3H, Me), 1.92-2.00 (m, 2H, CH<sub>2</sub>), 6.34 (t,  $^3J_{\text{HH}} = 8.6$ , 2H, Ph), 6.67 (t,  $^3J_{\text{HH}} = 8.7$ , 2H, Ph), 6.69-6.85 (m, 9H, Ph), 6.86-7.23 (m, 7H, Ph), 7.24-7.32 (m, 2H, Ph), 7.41-7.49 (m, 2H, Ph).  $^{31}\text{P}$  NMR (CDCl<sub>3</sub>): -4.4 (d,  $^1J_{\text{PP}} = 226.2$ , P<sub>1</sub>), 1.3 (d,  $^1J_{\text{PP}} = 236.8$ , P<sub>4</sub>), 40.9 (dd,  $^1J_{\text{PP}} = 236.8$ ,  $^2J_{\text{PP}} = 9.6$ , P<sub>3</sub>), 62.5 (dd,  $^1J_{\text{PP}} = 226.2$ ,  $^2J_{\text{PP}} = 9.0$ , P<sub>2</sub>).  $^{13}\text{C}$  NMR (CDCl<sub>3</sub>): 10.8 (dd,  $^3J_{\text{CP}} = 2.6$ ,  $^2J_{\text{CP}} = 19.4$ , Me), 12.4 (dd,  $^3J_{\text{CP}} = 7.3$ ,  $^2J_{\text{CP}} = 13.8$ , Me), 20.3 (dd,  $^2J_{\text{CP}} = 17.6$ ,  $^1J_{\text{CP}} = 29.6$ , CH<sub>2</sub>), 21.5 (ps.t,  $^2J_{\text{CP}} = 20.1$ ,  $^1J_{\text{CP}} = 21.6$ , CH<sub>2</sub>), 77.0 (dd,  $^1J_{\text{CP}} = 23.6$ ,  $^2J_{\text{CP}} = 7.6$ , C-PhF), 79.1 (dd,  $^1J_{\text{CP}} = 18.2$ ,  $^2J_{\text{CP}} = 9.5$ , C-PhF), 114.3 (s, *m*-Ph), 114.5 (s, *m*-Ph), 114.9 (s, *m*-Ph), 115.0 (s, *m*-Ph), 115.1 (s, *m*-Ph), 115.2 (s, *m*-Ph), 115.3 (s, *m*-Ph), 115.4 (s, *m*-Ph), 115.5 (s, *m*-Ph), 115.7 (s, *m*-Ph), 115.9 (s, *m*-Ph), 131.4 (s, *m*-Ph), 132.4 (s, *o*-Ph), 132.5 (s, *o*-Ph), 132.9 (s, *o*-Ph), 133.1 (s, *o*-Ph), 133.3 (s, *o*-Ph), 133.9 (s, *o*-Ph), 134.3 (s, *o*-Ph), 134.5 (s, *o*-Ph), 134.6 (s, *o*-Ph), 134.9 (s, *o*-Ph), 135.0 (s, *o*-Ph), 135.2 (s, *o*-Ph), 135.4 (s, *o*-Ph), 135.5 (s, *o*-Ph), 136.4 (d,  $^3J_{\text{CP}} = 4.4$ , *ipso*-Ph), 136.9 (dd,  $^2J_{\text{CP}} = 5.9$ ,  $^2J_{\text{CP}} = 18.4$ , *ipso*-Ph), 137.5 (d,  $^2J_{\text{CP}} = 9.0$ , *ipso*-Ph), 137.9 (d,  $^2J_{\text{CP}} = 13.7$ , *ipso*-Ph), 138.3 (d,  $^3J_{\text{CP}} = 8.3$ , *ipso*-Ph), 138.7 (dd,  $^2J_{\text{CP}} = 13.5$ ,  $^2J_{\text{CP}} = 8.8$ , *ipso*-Ph), 139.4 (dd,  $^1J_{\text{CP}} = 14.3$ ,  $^2J_{\text{CP}} = 4.8$ , C=C), 140.0 (dd,  $^1J_{\text{CP}} = 19.5$ ,  $^2J_{\text{CP}} = 5.4$ , C=C), 152.9 (d,  $^2J_{\text{CP}} = 14.8$ , C=C), 155.5 (dd,  $^2J_{\text{CP}} = 15.3$ ,  $^2J_{\text{CP}} = 13.9$ , C=C), 160.2 (d,  $^1J_{\text{CF}} = 156.4$ , C-F), 160.7 (d,  $^1J_{\text{CF}} = 151.9$ , C-F), 161.5 (d,  $^1J_{\text{CF}} = 153.2$ , C-F), 162.2 (d,  $^1J_{\text{CF}} = 153.4$ , C-F), 162.8 (d,  $^1J_{\text{CF}} = 152.9$ , C-F), 163.4 (d,  $^1J_{\text{CF}} = 150.2$ , C-F). IR (KBr, cm<sup>-1</sup>): 1017 (s, C-F), 1097 (s, C-F), 1158 (s, C-F). C<sub>46</sub>H<sub>34</sub>F<sub>6</sub>P<sub>4</sub> (825): calcd. C 67.00, H 4.16, P 15.02, F 13.82; found C 66.54, H 4.46, P 15.08, F 13.92.

### 10-Cyanomethylene-4,7,8,9-tetraphenyl-4-aza-1,10-

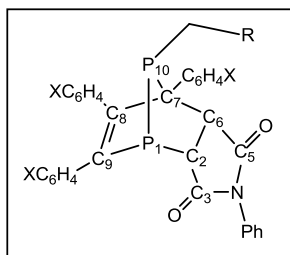

**diphosphatricyclo [5.2.1.0<sup>2,6</sup>] deca-8-ene-3,5-dione (3a).** 0.42 g (2.4 mmol, 50% excess) *N*-phenylmaleimide was added to the mixture of **1a** and isomeric cycloadducts **2a** (1:1 mixture, 0.60 g, ~1.63 mmol of 1a) in 10 mL toluene and stirred at 120°C for 25

hours. When the reaction was finished a light-yellow powder had precipitated, which was separated, washed with mixture of 20 ml *n*-hexane and 20 ml toluene, dried in vacuum and recrystallized from hot toluene (5 mL) to give 0.54 g (61%) white powder of 10-cyanomethylene-4,7,8,9-tetraphenyl-4-aza-1,10-diphosphatricyclo [5.2.1.0<sup>2,6</sup>]deca-8-ene-3,5-dione **3a** with m.p. 128°C. <sup>1</sup>H NMR (CDCl<sub>3</sub>): 1.78 (d, <sup>2</sup>J<sub>HP</sub> = 31.2, 2H, CH<sub>2</sub>), 4.24 (dd, <sup>3</sup>J<sub>HH</sub> = 6.38, <sup>3</sup>J<sub>HP</sub> = 10.9, 1H, C6-H), 4.57 (dd, <sup>2</sup>J<sub>HP</sub> = 19.6, <sup>3</sup>J<sub>HH</sub> = 7.2, 1H, C2-H), 6.16 (d, <sup>3</sup>J<sub>HH</sub> = 9.1, 4H, Ph), 7.05 (d, <sup>3</sup>J<sub>HH</sub> = 7.3, 4H, Ph), 7.07 (d, <sup>3</sup>J<sub>HH</sub> = 6.8, 4H, Ph), 7.14 (d, <sup>3</sup>J<sub>HH</sub> = 6.2, 2H, Ph), 7.36 (d, <sup>3</sup>J<sub>HH</sub> = 6.7, 1H, Ph), 7.56-7.61 (m, 5H, Ph). <sup>31</sup>P NMR (CDCl<sub>3</sub>): -28.7 (d, <sup>1</sup>J<sub>PP</sub> = 198.5, P<sub>10</sub>), 51.4 (d, <sup>1</sup>J<sub>PP</sub> = 198.5, P<sub>1</sub>). <sup>13</sup>C NMR (CDCl<sub>3</sub>): 20.1 (dd, <sup>1</sup>J<sub>CP</sub> = 22.2, <sup>2</sup>J<sub>CP</sub> = 14.2, CH<sub>2</sub>), 41.6 (s, C6), 47.6 (d, <sup>1</sup>J<sub>CP</sub> = 32.3, C2), 71.7 (dd, <sup>1</sup>J<sub>CP</sub> = 28.3, <sup>2</sup>J<sub>CP</sub> = 4.4, C7), 115.4 (d, <sup>2</sup>J<sub>CP</sub> = 6.4, CN), 125.2 (s, *p*-C<sub>Ph</sub>), 126.1 (s, *p*-C<sub>Ph</sub>), 126.8 (s, *p*-C<sub>Ph</sub>), 127.4 (s, *p*-C<sub>Ph</sub>), 127.6 (s, *m*-C<sub>Ph</sub>), 128.1 (s, *m*-C<sub>Ph</sub>), 128.3 (s, *m*-C<sub>Ph</sub>), 128.7 (s, *m*-C<sub>Ph</sub>), 128.9 (s, *o*-C<sub>Ph</sub>), 129.1 (s, *o*-C<sub>Ph</sub>), 129.3 (s, *o*-C<sub>Ph</sub>), 130.1 (s, *o*-C<sub>Ph</sub>), 130.7 (s, *ipso*-C<sub>Ph</sub>), 131.2 (s, *ipso*-C<sub>Ph</sub>), 135.2 (d, <sup>2</sup>J<sub>CP</sub> = 6.2, *ipso*-C<sub>Ph</sub>), 136.1 (d, <sup>1</sup>J<sub>CP</sub> = 20.1, *ipso*-C<sub>Ph</sub>), 139.3 (dd, <sup>2</sup>J<sub>CP</sub> = 7.9, <sup>2</sup>J<sub>CP</sub> = 9.6, C8), 154.4 (dd, <sup>1</sup>J<sub>CP</sub> = 19.1, <sup>2</sup>J<sub>CP</sub> = 4.0, C9), 172.9 (s, C3), 175.6 (s, C5). IR (KBr, cm<sup>-1</sup>): 1719 (s, CO), 1777 (m, CO), 2211 (s, CN). C<sub>33</sub>H<sub>24</sub>N<sub>2</sub>O<sub>2</sub>P<sub>2</sub> (544): calcd. C 73.06, H 4.46, P 11.42, N 5.15; found C 73.35, H 4.76, P 11.16, N 5.00.

**10-Ethylacetyl-4,7,8,9-tetraphenyl-4-aza-1,10-diphosphatricyclo[5.2.1.0<sup>2,6</sup>]deca-8-ene-3,5-dione (3b).** In a similar manner **3b** was obtained from mixture of **1b** and



isomeric cycloadducts **2b** (1:1 mixture, 0.55 g, 1.32 mmol of 1b) and excess of *N*-phenylmaleinimide (0.35 g, 2.0 mmol, 50% excess) as a white powder; yield 0.51 g (65%); m.p. 130°C. <sup>1</sup>H NMR (CDCl<sub>3</sub>): 0.72 (t, <sup>3</sup>J<sub>HH</sub> = 7.8, 3H, CH<sub>3</sub>), 1.92 (q, <sup>3</sup>J<sub>HH</sub> = 7.8, 2H, OCH<sub>2</sub>), 2.18-2.20 (m, 2H, CH<sub>2</sub>), 4.55 (dd, <sup>3</sup>J<sub>HH</sub> = 5.4, <sup>3</sup>J<sub>HP</sub> = 14.1, 1H, C6-H), 4.77 (dd, <sup>3</sup>J<sub>HH</sub> = 6.2, <sup>2</sup>J<sub>HP</sub> = 19.6, 1H, C2-H), 6.75 (d, 5H, <sup>3</sup>J<sub>HH</sub> = 9.3, Ph), 6.99 (d, 5H, <sup>3</sup>J<sub>HH</sub> = 7.3, Ph), 7.07 (d, 5H, <sup>3</sup>J<sub>HH</sub> = 6.8, Ph), 7.14 (d, 4H, <sup>3</sup>J<sub>HH</sub> = 6.4, Ph), 7.36 (d, 1H, <sup>3</sup>J<sub>HH</sub> = 6.8, Ph). <sup>31</sup>P NMR (CDCl<sub>3</sub>): -26.7 (d, <sup>1</sup>J<sub>PP</sub> = 198.3, P<sub>10</sub>), 56.9 (d, <sup>1</sup>J<sub>PP</sub> = 198.3, P<sub>1</sub>). <sup>13</sup>C NMR (CDCl<sub>3</sub>): 11.2 (s, CH<sub>3</sub>), 26.8 (s, CH<sub>2</sub>), 30.2 (dd, <sup>1</sup>J<sub>CP</sub> = 13.7, <sup>2</sup>J<sub>CP</sub> = 6.8, CH<sub>2</sub>), 48.7 (s, C2), 51.1 (s, C6), 74.8 (dd, <sup>1</sup>J<sub>CP</sub> = 24.3, <sup>2</sup>J<sub>CP</sub> = 2.8, C7), 125.8 (s, *p*-C<sub>Ph</sub>), 126.2 (s, *p*-C<sub>Ph</sub>), 126.7 (s, *p*-C<sub>Ph</sub>), 126.8 (s, *p*-C<sub>Ph</sub>), 127.1 (s, *m*-C<sub>Ph</sub>), 127.2 (s, *m*-C<sub>Ph</sub>), 127.4 (s, *m*-C<sub>Ph</sub>), 127.6 (s, *m*-C<sub>Ph</sub>), 127.7 (s, *o*-C<sub>Ph</sub>), 128.4 (s, *o*-C<sub>Ph</sub>), 129.4 (s, *o*-C<sub>Ph</sub>), 130.5 (s, *o*-C<sub>Ph</sub>), 130.8 (s, *ipso*-C<sub>Ph</sub>), 131.4 (s, *ipso*-C<sub>Ph</sub>), 138.9 (d, <sup>2</sup>J<sub>CP</sub> = 5.3, *ipso*-C<sub>Ph</sub>), 139.7 (d, <sup>1</sup>J<sub>CP</sub> = 20.0, *ipso*-C<sub>Ph</sub>), 140.9 (dd, <sup>1</sup>J<sub>CP</sub> = 27.7, <sup>2</sup>J<sub>CP</sub> = 19.2, C8), 157.9 (dd, <sup>2</sup>J<sub>CP</sub> = 18.3, <sup>2</sup>J<sub>CP</sub> = 4.1, C9), 174.9 (s, C3), 177.9 (s, C5), 185 (d, <sup>2</sup>J<sub>CP</sub> = 9.8, C(O)O). IR (KBr, cm<sup>-1</sup>): 1713 (s, CO), 1773 (m, CO), 1800 (s, C(O)O). C<sub>35</sub>H<sub>29</sub>NO<sub>4</sub>P<sub>2</sub> (590): calcd. C 71.30, H 4.96, P 10.51, N 2.38; found C 71.35, H 4.76, P 10.76, N 2.37.

**10-Methoxymethyl-4,7,8,9-tetraphenyl-4-aza-1,10diphosphatricyclo[5.2.1.0<sup>2,6</sup>]deca-8-ene-3,5-dione (3c).** In a similar manner **3c** was obtained from mixture of **1c** and isomeric cycloadducts **2c** (1:1 mixture, 0.41 g, 1.09 mmol of 1c) and excess of *N*-phenylmaleinimide (0.27 g, 1.64 mmol, 50 % excess) as a white powder; yield 0.37 g (62%); m.p. 134°C. <sup>1</sup>H NMR (CDCl<sub>3</sub>): 0.86 (s, 3H, CH<sub>3</sub>), 2.34-2.37 (m, 2H, CH<sub>2</sub>), 4.23 (dd, <sup>3</sup>J<sub>HH</sub> = 6.1, <sup>3</sup>J<sub>HP</sub> = 12.2, 1H, C6-H), 4.34 (dd, <sup>3</sup>J<sub>HH</sub> = 5.2, <sup>2</sup>J<sub>HP</sub> = 17.3, 1H, C2-H), 6.75 (d, 5H, <sup>3</sup>J<sub>HH</sub> = 9.3, Ph), 6.99 (d, 5H, <sup>3</sup>J<sub>HH</sub> = 7.3, Ph), 7.07 (d, 4H, <sup>3</sup>J<sub>HH</sub> = 6.9, Ph), 7.14 (d, 4H, <sup>3</sup>J<sub>HH</sub> = 6.4, Ph), 7.36 (d, 2H, <sup>3</sup>J<sub>HH</sub> = 6.9, Ph). <sup>31</sup>P NMR (CDCl<sub>3</sub>): -25.1 (d, <sup>1</sup>J<sub>PP</sub> = 200.3, P<sub>10</sub>), 68.3 (d, <sup>1</sup>J<sub>PP</sub> = 200.3, P<sub>1</sub>). <sup>13</sup>C NMR (CDCl<sub>3</sub>): 15.1 (d, <sup>3</sup>J<sub>CP</sub> = 3.9,

CH<sub>3</sub>), 30.3 (dd, <sup>1</sup>J<sub>CP</sub> = 23.8, <sup>2</sup>J<sub>CP</sub> = 5.9, CH<sub>2</sub>), 43.3 (dd, <sup>1</sup>J<sub>CP</sub> = 33.0, <sup>2</sup>J<sub>CP</sub> = 14.6, C<sub>2</sub>), 44.5 (d, <sup>2</sup>J<sub>CP</sub> = 16.9, C<sub>6</sub>), 71.4 (dd, <sup>1</sup>J<sub>CP</sub> = 22.5, <sup>2</sup>J<sub>CP</sub> = 6.7, C<sub>7</sub>), 126.0 (s, *p*-C<sub>Ph</sub>), 127.3 (s, *p*-C<sub>Ph</sub>), 127.6 (s, *p*-C<sub>Ph</sub>), 127.8 (s, *p*-C<sub>Ph</sub>), 127.9 (s, *m*-C<sub>Ph</sub>), 128.4 (s, *m*-C<sub>Ph</sub>), 128.9 (s, *m*-C<sub>Ph</sub>), 129.4 (s, *m*-C<sub>Ph</sub>), 129.5 (s, *o*-C<sub>Ph</sub>), 129.7 (s, *o*-C<sub>Ph</sub>), 129.9 (s, *o*-C<sub>Ph</sub>), 130.0 (s, *o*-C<sub>Ph</sub>), 130.7 (s, *ipso*-C<sub>Ph</sub>), 131.4 (s, *ipso*-C<sub>Ph</sub>), 134.2 (s, *ipso*-C<sub>Ph</sub>), 136.1 (d, <sup>1</sup>J<sub>CP</sub> = 5.1, *ipso*-C<sub>Ph</sub>), 139.1 (dd, <sup>2</sup>J<sub>CP</sub> = 23.1, <sup>2</sup>J<sub>CP</sub> = 2.6, C<sub>8</sub>), 141.3 (dd, <sup>1</sup>J<sub>CP</sub> = 23.1, <sup>2</sup>J<sub>CP</sub> = 2.6, C<sub>9</sub>), 168.7 (d, <sup>2</sup>J<sub>CP</sub> = 10.5, C<sub>3</sub>), 174.6 (d, <sup>3</sup>J<sub>CP</sub> = 14.8, C<sub>5</sub>). IR (KBr, cm<sup>-1</sup>): 1714 (s, CO), 1774 (m, CO). C<sub>33</sub>H<sub>27</sub>NO<sub>3</sub>P<sub>2</sub> (548): calcd. C 72.39, H 4.97, P 11.31, N 2.56; found C 72.35, H 4.86, P 11.46, N 2.47.

#### 10-Ethyl-7,8,9-tri(*para*-fluorophenyl)-4-aza-4-phenyl-1,10-diphosphatricyclo-

[5.2.1.0<sup>2,6</sup>] deca-8-ene-3,5-dione (**3e**). In a similar manner **3e** was obtained from cycloadduct *rac*-2,3,4,4a,5,6-hexa(*para*-fluorophenyl)-1-ethyl-1,7,7a-triphospha-4,7-(ethylphosphinidene)-indene (**2e**) (0.16 g, 0.19 mmol) and excess of *N*-phenylmaleinimide (0.06 g, 0.29 mmol, 50 % excess) as a white powder; yield 0.12 g (55%); m.p. 130°C. <sup>1</sup>H NMR (CDCl<sub>3</sub>): 0.72 (t, 3H, <sup>3</sup>J<sub>HH</sub> = 7.8, CH<sub>3</sub>), 1.32-1.35 (m, 2H, CH<sub>2</sub>), 4.43 (dd, <sup>3</sup>J<sub>HH</sub> = 5.4, <sup>2</sup>J<sub>HP</sub> = 14.1, 1H, C<sub>6</sub>-H), 4.77 (dd, <sup>3</sup>J<sub>HH</sub> = 6.3, <sup>2</sup>J<sub>HP</sub> = 15.2, 1H, C<sub>2</sub>-H), 6.75 (d, 4H, <sup>3</sup>J<sub>HH</sub> = 9.3, Ph), 6.99 (d, 4H, <sup>3</sup>J<sub>HH</sub> = 7.3, Ph), 7.07 (d, 4H, <sup>3</sup>J<sub>HH</sub> = 6.8, Ph), 7.14 (d, 3H, <sup>3</sup>J<sub>HH</sub> = 6.4, Ph), 7.36 (d, 2H, <sup>3</sup>J<sub>HH</sub> = 6.8, Ph). <sup>31</sup>P NMR (CDCl<sub>3</sub>): -28.1 (d, <sup>1</sup>J<sub>PP</sub> = 196.5, P<sub>10</sub>), 80.3 (d, <sup>1</sup>J<sub>PP</sub> = 196.5, P<sub>1</sub>). <sup>13</sup>C NMR (CDCl<sub>3</sub>): 11.1 (d, <sup>2</sup>J<sub>CP</sub> = 7.8, CH<sub>3</sub>), 30.5 (dd, <sup>1</sup>J<sub>CP</sub> = 23.7, <sup>2</sup>J<sub>CP</sub> = 8.8, CH<sub>2</sub>), 48.7 (s, C<sub>2</sub>), 51.1 (s, C<sub>6</sub>), 74.8 (dd, <sup>1</sup>J<sub>CP</sub> = 24.3, <sup>2</sup>J<sub>CP</sub> = 2.8, C<sub>7</sub>), 125.9 (s, *p*-C<sub>Ph</sub>), 126.4 (s, *p*-C<sub>Ph</sub>), 126.6 (s, *p*-C<sub>Ph</sub>), 126.7 (s, *p*-C<sub>Ph</sub>), 127.1 (s, *m*-C<sub>Ph</sub>), 127.2 (s, *m*-C<sub>Ph</sub>), 127.4 (s, *m*-C<sub>Ph</sub>), 127.5 (s, *m*-C<sub>Ph</sub>), 127.6 (s, *o*-C<sub>Ph</sub>), 128.3 (s, *o*-C<sub>Ph</sub>), 129.3 (s, *o*-C<sub>Ph</sub>), 130.4 (s, *o*-C<sub>Ph</sub>), 130.6 (s, *ipso*-C<sub>Ph</sub>), 131.7 (s, *ipso*-C<sub>Ph</sub>), 138.8 (d, <sup>2</sup>J<sub>CP</sub> = 5.2, *ipso*-C<sub>Ph</sub>), 139.2 (d, <sup>1</sup>J<sub>CP</sub> = 20.7, *ipso*-C<sub>Ph</sub>), 138.5 (dd, <sup>1</sup>J<sub>CP</sub> = 21.7, <sup>2</sup>J<sub>CP</sub> = 18.3, C<sub>8</sub>), 154.9 (dd, <sup>2</sup>J<sub>CP</sub> = 18.3, <sup>2</sup>J<sub>CP</sub> = 4.1, C<sub>9</sub>), 162.2 (d, <sup>1</sup>J<sub>CF</sub> =

154.4, C-F), 162.4 (d,  $^1J_{CF} = 156.9$ , C-F), 162.5 (d,  $^1J_{CF} = 160.2$ , C-F), 174.9 (s, C3), 177.99 (s, C5). IR (KBr,  $\text{cm}^{-1}$ ): 1023 (s, C-F), 1063 (s, C-F), 1118 (s, C-F), 1714 (s, CO), 1773 (m, CO).  $\text{C}_{33}\text{H}_{24}\text{F}_3\text{NO}_2\text{P}_2$  (585): calcd. C 67.70, H 4.13, P 10.58, F 9.73, N 2.39; found C 67.50, H 4.33, P 10.38, F 9.83, N 2.49.

## References

1. Bruker APEX2 Software Suite for Crystallographic Programs, Bruker AXS, Inc., Madison, WI, USA, **2009**.
2. Bruker Area detector control and integration software. Version 5.x. In: SMART and SAINT. Madison, Wisconsin (USA): Bruker Analytical X-ray Instruments Inc.; **1996**.
3. Sheldrick, G. M. SADABS: Programs for Crystal Structure Analysis, University of Göttingen, Institut für Anorganische Chemie der Universität, Tammanstrasse 4, D-3400 Göttingen, Germany, **1997**.
4. Sheldrick, G. M. *Acta Crystallogr.* **2008**, 64, 112-122.
5. Farrugia, L. J. *J. Appl. Cryst.* **1997**, 30, 565-566.
6. Macrae, F.; Bruno, I. J.; Chisholm, J.A.; Edgington, P.R.; McCabe, P.; Pidcock, E.; Rodriguez-Monge, L.; Taylor, R.; Streek J. van de; Wood, P. A. *J. Appl. Cryst.* **2008**, 41, 466-470.
7. Spek, A. L. *Acta Crystallogr., Sect. D: Biol. Crystallogr.* **2009**, 65, 148-155.
8. Bezkishko I.; Miluykov V.; Kataev A.; Krivolapov D.; Litvinov I.; Sinyashin O.; Hey-Hawkins E. *J. Organomet. Chem.* **2008**, 693, 3318–3320.
9. Bezkishko I.; Miluykov V.; Sinyashin O.; Hey-Hawkins E.; *Phosphorus, Sulfur, and Silicon and the Rel. Elem.*, **2011**, 186, 657–659.
